# Supplementary material for: Prognostic and predictive value of monocarboxylate transporter 4 in patients with breast cancer
Source: PubMed Central journal article supplement — Oncol Lett. 2020 Jun 25;20(3):2143–52. doi: 10.3892/ol.2020.11776 (PMC7400967; doi:10.3892/ol.2020.11776), 2020-06-25
Supplement: Supplementary_Data.pdf [file Supplementary_Data.pdf]

Table SI. Patient survival status at the end of the follow-up period.

| Survival status | Cases, n | %    |
|-----------------|----------|------|
| Alive           | 102      | 70.3 |
| Deceased        | 43       | 29.7 |
